# Supplementary material for: Centros residenciales para personas mayores. Modelo de atención centrado en la persona
Source: Royal Society of Chemistry journal article supplement (doi:10.1039/d2lc00612j), 2014-01-01

## 3D Printing

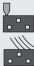

Print Part

Cure

## PDMS Molding

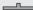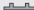

Create Molds

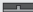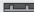

Pour PDMS

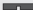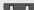

Separate Molds

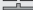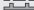

Align Layers

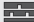

Bond Layers

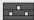

## Hot Embossing

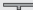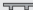

Create Molds

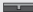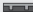

Apply Heat and Pressure

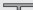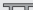

Cool and Separate Molds

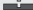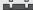

Align Layers

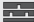

Bond Layers

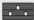

Supplement: d2lc00612j6.pdf [file d2lc00612j6.pdf]
