# Supplementary figures and images for: Centros residenciales para personas mayores. Modelo de atención centrado en la persona
Source: Royal Society of Chemistry journal article supplement (doi:10.1039/d2lc00612j), 2014-01-01

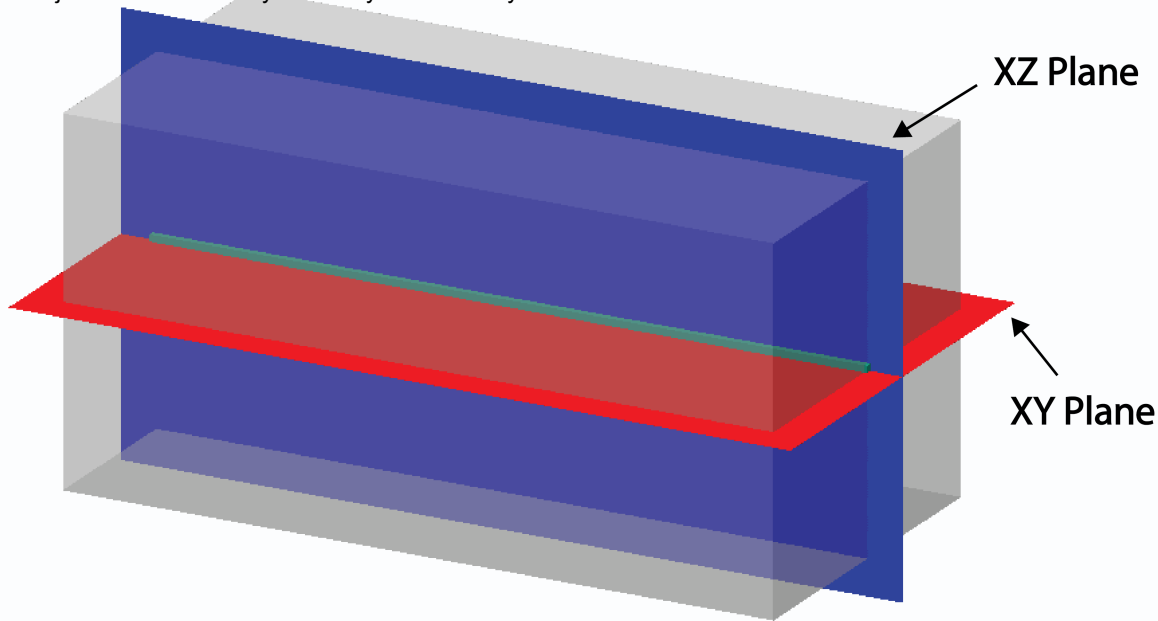

Supplement: d2lc00612j2.pdf [file d2lc00612j2.pdf]

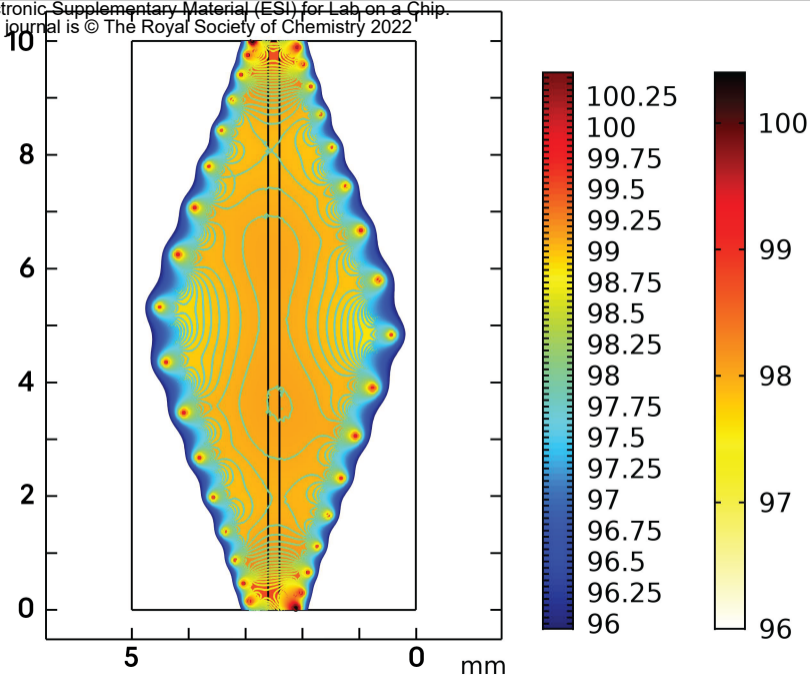

Supplement: d2lc00612j3.pdf [file d2lc00612j3.pdf]

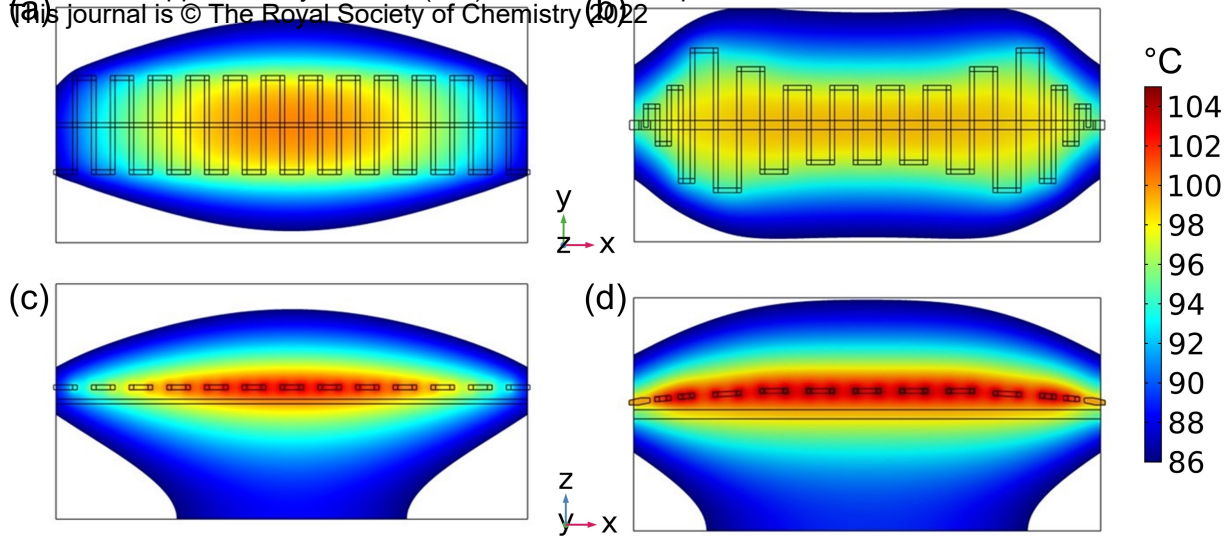

Supplement: d2lc00612j4.pdf [file d2lc00612j4.pdf]

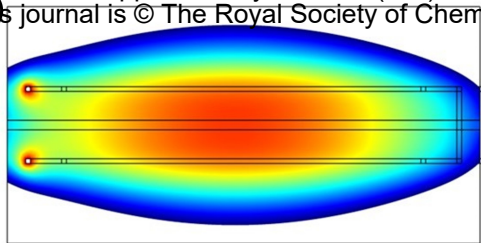

y  
z → x

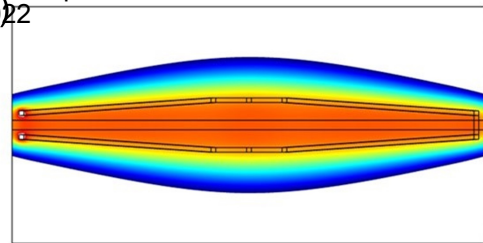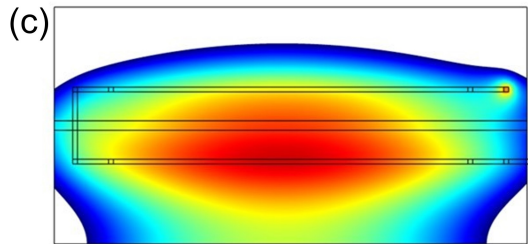

z  
y → x

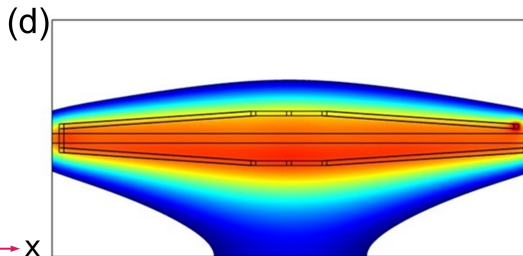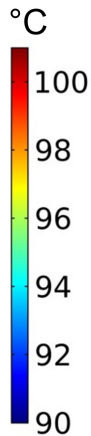

Supplement: d2lc00612j5.pdf [file d2lc00612j5.pdf]

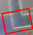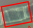

A

C

B

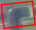

Supplement: d2lc00612j7.pdf [file d2lc00612j7.pdf]
